# Supplementary material for: Towards Whole Health Toxicology: In-Silico Prediction of Diseases Sensitive to Multi-Chemical Exposures
Source: MDPI journal article supplement (doi:10.3390/toxics10120764), 2022-12-08
Supplement: s1 [file s1]

### KEGG Noncancer Diseases Neighbour Distant Plot

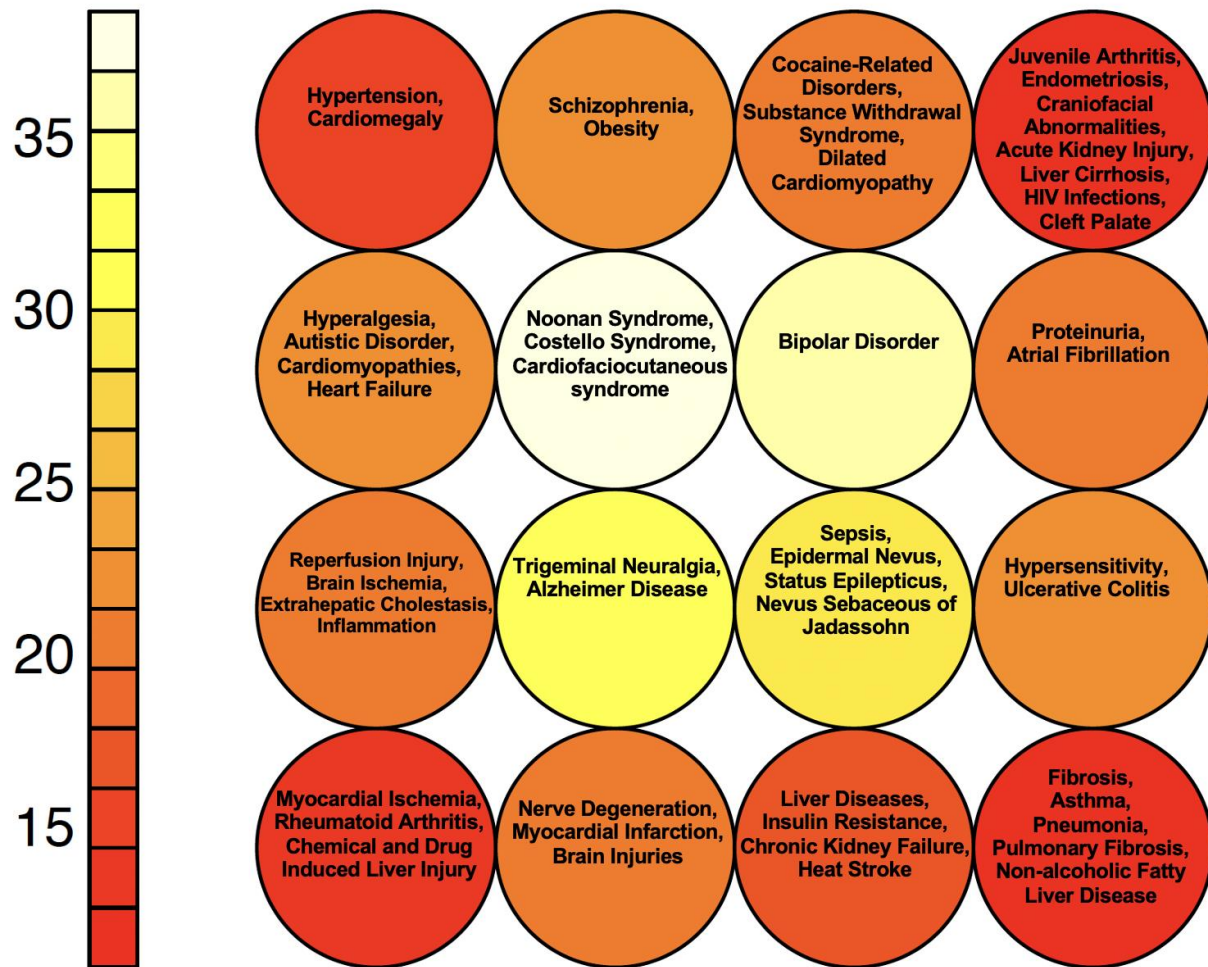

**Figure S1.** SOM neighbor distant plot of non-neoplastic diseases based on the similarity of their overlap with chemically sensitive KEGG pathways.

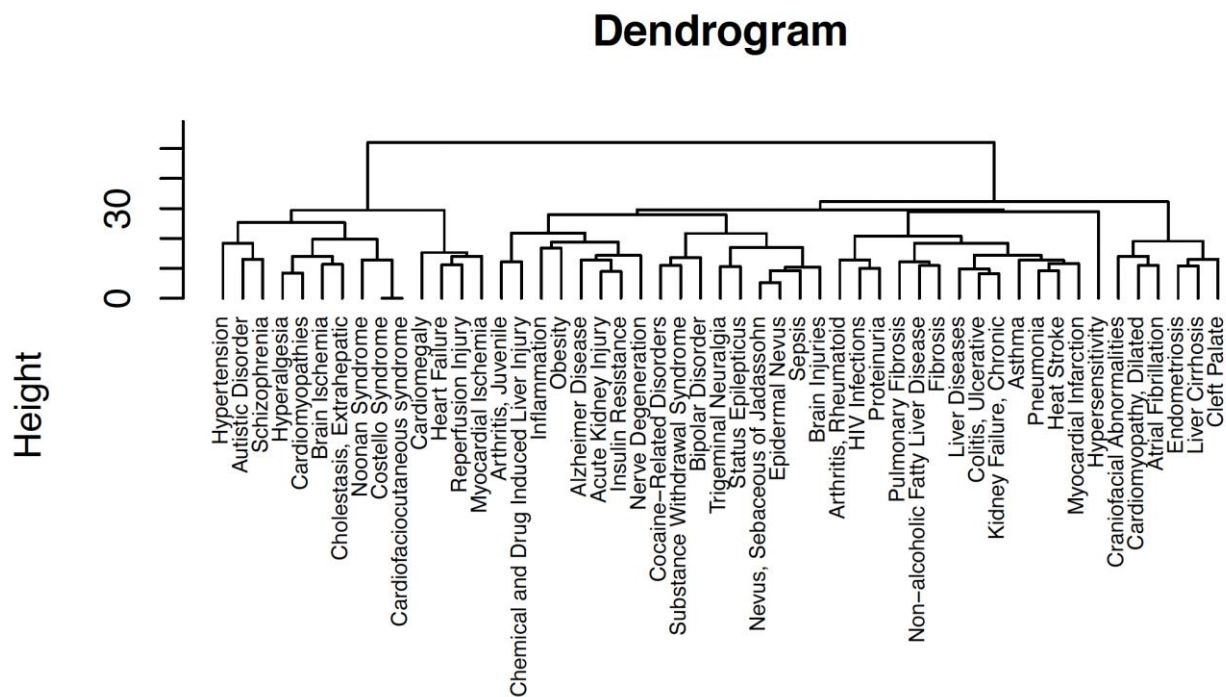

**Figure S2.** Hierarchical clustering of non-neoplastic diseases based on the similarity of their overlap with chemically sensitive KEGG pathways.
